1 **T cells expanded from renal cell carcinoma are tumor-reactive but fail to produce**  
2 **IFN- $\gamma$ , TNF- $\alpha$  or IL-2**

3 Saskia D. van Asten<sup>1,2#</sup>, Rosa de Groot<sup>2,3,4#</sup>, Marleen M. van Loenen<sup>2,3</sup>, Jeroen de Jong<sup>5</sup>, Kim  
4 Monkhorst<sup>5</sup>, John B.A.G. Haanen<sup>6</sup>, Derk Amsen<sup>2,3</sup>, Axel Bex<sup>7</sup>, Robbert M. Spaapen<sup>1,2\*</sup>, Monika C.  
5 Wolkers<sup>2,3,4\*</sup>

6 <sup>1</sup>Sanquin Research, Dept. of Immunopathology, Amsterdam, The Netherlands

7 <sup>2</sup>Landsteiner Laboratory, Amsterdam UMC, University of Amsterdam, Amsterdam, The Netherlands

8 <sup>3</sup>Sanquin Research, Dept. of Hematopoiesis, Amsterdam, The Netherlands

9 <sup>4</sup>Oncode Institute, Utrecht, The Netherlands

10 <sup>5</sup>The Netherlands Cancer Institute-Antoni van Leeuwenhoek Hospital (NKI-AvL), Dept. of Pathology,  
11 Amsterdam, The Netherlands

12 <sup>6</sup>NKI-AvL, Dept. of Medical Oncology, Amsterdam, The Netherlands

13 <sup>7</sup>NKI-AvL, Dept. of Urology, Amsterdam, The Netherlands

14 <sup>8</sup>Royal Free London NHS Foundation Trust, UCL Division of Surgery and Interventional Science, London, United  
15 Kingdom

16

17

18 #, \* authors contributed equally

19 The authors declare no potential conflicts of interest.

20

21 **Running title: Expanded tumor-reactive RCC-TILs fail to produce cytokines**

22

23

24

25

26

27

28 **Corresponding Authors:**

29 Monika Wolkers, PhD, Department of Hematopoiesis, Sanquin, Plesmanlaan 125, 1066CX,

30 Amsterdam, The Netherlands. Phone: +31 624268490; e-mail: [m.wolkers@sanquin.nl](mailto:m.wolkers@sanquin.nl)

31 Robbert Spaapen, PhD, Department of Immunopathology, Sanquin, Plesmanlaan 125, 1066CX,

32 Amsterdam, The Netherlands. Phone: +31 610906464; e-mail: [r.spaapen@sanquin.nl](mailto:r.spaapen@sanquin.nl)

## 1 **Abstract**

2 Metastatic renal cell carcinoma (RCC) has a poor prognosis. Recent advances have shown beneficial  
3 responses to immune checkpoint inhibitors, such as anti-PD-1 or anti-PD-L1 antibodies. As only a  
4 subset of RCC patients respond, alternative strategies should be explored. Patients refractory to  
5 anti-PD-1 therapy may benefit from autologous tumor infiltrating lymphocyte (TIL) therapy. Even  
6 though efficient TIL expansion was reported from RCC lesions, it is not well established how many  
7 RCC TIL products are tumor-reactive, how well they produce pro-inflammatory cytokines in response  
8 to autologous tumors, and whether their response correlates with the presence of specific immune  
9 cells in the tumor lesions.

10 We here compared the immune infiltrate composition of RCC lesions with that of autologous kidney  
11 tissue of 18 RCC patients. T cell infiltrates were increased in the tumor lesions, and CD8<sup>+</sup> T cell  
12 infiltrates were primarily of effector memory phenotype. Nine out of 16 (56%) tested TIL products  
13 we generated were tumor-reactive, as defined by CD137 upregulation after exposure to autologous  
14 tumor digest. Tumor reactivity was found in particular in TIL products originating from tumors with a  
15 high percentage of infiltrated T cells compared to autologous kidney, and coincided with increased  
16 *ex vivo* CD25 expression on CD8<sup>+</sup> T cells. Importantly, although TIL products had the capacity to  
17 produce the key effector cytokines IFN- $\gamma$ , TNF- $\alpha$  or IL-2, they failed to do so in response to  
18 autologous tumor digests. In conclusion, TIL products from RCC lesions contain tumor-reactive T  
19 cells. Their lack of tumor-specific cytokine production requires further investigation of  
20 immunosuppressive factors in RCC and subsequent optimization of RCC-derived TIL culture  
21 conditions.

22

23 **Key words:** TIL therapy, RCC, immunotherapy, immune composition, dysfunctional T cells, CD137

24

25

## 1 Introduction

2 Patients with metastatic renal cell carcinoma (RCC) have a poor 5-year survival rate.<sup>1</sup> Several lines of  
3 evidence suggest that RCC patients may benefit from immunotherapy.<sup>1,2</sup> In the past, treatment with  
4 high dose IL-2 resulted in partial responses. However, severe acute toxicities were common.<sup>3-5</sup>  
5 Allogeneic stem cell transplantation also elicited complete responses in several RCC patients,<sup>6,7</sup> a  
6 finding that could not be reproduced by others.<sup>8-10</sup> Whilst the degree of T cell infiltration in RCC  
7 inversely correlated with the patient's survival, recent advances with checkpoint inhibitors to  
8 reinvigorate T cell responses yielded robust response rates in RCC patients.<sup>11,12</sup> Antibodies directed  
9 against PD-1 or its ligands PD-L1 and PD-L2 in combination with anti-CTLA-4 or axitinib, a VEGFR  
10 tyrosine kinase inhibitor, resulted in 50% objective response rates of metastatic clear-cell RCC  
11 patients, and led to complete responses in 10% of the patients.<sup>13,14</sup> This combination therapy has  
12 therefore replaced anti-VEGF targeted therapy as the new standard of care for treatment of naïve  
13 RCC patients.

14

15 Another emerging immunotherapeutic treatment is the administration of *ex vivo* reprogrammed  
16 tumor infiltrating lymphocytes (TILs). This adoptive TIL therapy induced objective responses in  
17 almost half of treated metastatic melanoma patients, and complete responses in 15-20% of  
18 patients.<sup>15-17</sup> Furthermore, TIL infusion yielded an objective response rate of 38% in melanoma  
19 patients that were refractory to anti-PD-1 therapy, indicating that TIL therapy represents an  
20 alternative treatment for patients who fail to respond to immune checkpoint blockade.<sup>18</sup> The success  
21 rate of TIL therapy to treat metastatic melanoma has sparked the interest to develop TIL therapy for  
22 other solid tumors, such as ovarian, colon, liver, breast and non-small cell lung cancers.<sup>19-24</sup> TIL  
23 products have also been generated from RCC lesions.<sup>25-28</sup> Although the expansion rate of RCC-  
24 derived TILs was comparable to that of melanoma-derived TILs, the *in vitro* response rates to  
25 autologous tumors were highly variable,<sup>25-28</sup> a characteristic that is not well understood. It would be  
26 useful to be able to predict from the composition of the initial tumor infiltrate which TIL products  
27 will be tumor-reactive. However biomarkers that allow such prediction have not been identified.  
28 Furthermore, it is unclear whether those RCC-derived TIL products that respond to tumors contain T  
29 cells that co-produce multiple effector molecules in response to autologous tumors. Such  
30 polyfunctionality is considered a prerequisite for successful anti-tumor T cell responses as well as for  
31 TIL therapy.<sup>29,30</sup>

32

33 In this study, we characterized the patient-specific RCC immune cell composition compared to  
34 autologous non-tumor kidney tissue. Irrespective of high inter-patient variation, we found that T

1 cells, especially of the effector memory subtype, constituted the major immune cell type in the RCC  
2 tumors, that were predominantly of the clear cell subtype. RCC-derived T cells responded to the  
3 autologous tumor digest by CD137 upregulation in 9 out of 16 (56%) patients. Higher frequencies of  
4 tumor-reactive T cells were found in TIL products generated from tumor lesions with high T cell  
5 infiltrates, in particular when CD8<sup>+</sup> T cells expressed high levels of CD25. Strikingly, even though  
6 expanded TILs had the capacity to produce all key cytokines upon PMA/ionomycin stimulation, they  
7 failed to do so in response to autologous tumor tissue.  
8

## 1 **Methods**

### 2 *Materials and solutions*

3 Several solutions were used in sample processing. Collection medium consisted of 50µg/ml  
4 gentamycin (Sigma-Aldrich), 2% Penicillin-Streptomycin (P/S), 12.5µg/ml Fungizone (Amphotericin B,  
5 Gibco) and 20% fetal calf serum (FCS) (Bodego). Digestion medium consisted of 30 IU/ml collagenase  
6 IV (Worthington), 1% FCS and 12.5µg/ml DNase (Roche) in IMDM (Gibco). Washing medium  
7 consisted of 2% FCS and 2% P/S in RPMI 1640 (Gibco). FACS buffer contained 2% FCS and 2mM EDTA  
8 in PBS. Red blood cell lysis buffer consisted of 155 mM NH<sub>4</sub>Cl, 10 mM KHCO<sub>3</sub> and 0.1 mM EDTA (pH  
9 7.4) in PBS. T cell culture medium consisted of 5% human serum (Sanquin), 5% FCS, 50 µg/ml  
10 gentamycin and 1.25 µg/ml fungizone in 20/80 T cell mixed media (Miltenyi Biotech). Freezing  
11 medium consisted of 10% DMSO (Corning) and 30% FCS in IMDM.

### 12 *Sampling of tumor and non-tumor kidney tissue*

13 Tumor and spatially distant non-tumor kidney tissue were collected from 20 RCC patients  
14 undergoing a nephrectomy from April 2016 to March 2018. Patient 08 was excluded from this study  
15 as the collected tumor piece proved too small for isolation of sufficient cell numbers for *ex vivo*  
16 analysis. A patient with oncocytoma (patient 11) was excluded from all analysis because we aimed to  
17 analyze malignant material only. From patient 05 we could only collect tumor tissue. This patient  
18 was therefore excluded from non-tumor and tumor paired comparisons. The patient characteristics  
19 of the 18 included patients are shown in Table 1. The cohort included 5 female and 13 male patients.  
20 14 Tumors were classified as clear cell carcinoma, three as chromophobe and one as not otherwise  
21 specified (NOS). The tumor diameters ranged from 5.2 cm to 16.5 cm. The patient age at time of  
22 surgery ranged from 51 to 79, with a mean age of 63. Seven patients were smokers. The study was  
23 performed according to the Declaration of Helsinki (seventh revision, 2013), and executed with  
24 approval of the Institutional Review Board of the Dutch Cancer Institute (NKI), Amsterdam, the  
25 Netherlands.

26 The tissue was obtained directly after surgery, stored in collection medium, weighed, and  
27 completely processed within 5 hours, except for patients 12 and 13, which were processed within 18  
28 hours.

### 29 *Isolation & digestion*

30 We used our standardized isolation, digestion and TIL culture procedures as described before<sup>21</sup>. In  
31 short, the tissues were chopped into small pieces of ~1mm<sup>3</sup> and incubated for 45 minutes at 37 °C in  
32 5 ml digestion medium/g tissue. After digestion, cell suspensions were centrifuged for 10 min at 360

1 g. The pellets were washed with washing medium. After removal of the washing medium by  
2 centrifugation, cell pellets were vigorously suspended in FACS buffer to loosen the cells from the  
3 tissue. The cell suspensions were filtered over an autoclaved tea filter, followed by filtering over a  
4 100  $\mu\text{m}$  cell strainer (Falcon). The pelleted flow-through was treated with Red blood cell lysis buffer  
5 for 15 minutes at 4°C. The cell suspensions were again washed with FACS buffer before counting.  
6 The cells were manually counted in trypan blue solution (Sigma). 1-2 million live cells were used per  
7 flow cytometry panel (2-4 million total), 1 million live cells for TIL cultures, and the remaining cells  
8 were cryo preserved.

### 9 *Ex vivo flow cytometry*

10 Cells were stained at 4°C in FACS buffer for 30 minutes in U-bottom 96-well plates at 1-2 million cells  
11 per panel. For the immune cell subset analysis, the staining mix included the following antibodies:  
12 CD11c PerCP-Cy5.5, CD15 BV605, CD3 BV510, CD11B BV421, CD274 PE (all Biolegend), anti-HLA-DR  
13 FITC, CD45 BUV805, CD19 BUV737, CD20 BUV737, CD16 BUV496, CD1a BUV395, CD33 AF700 (all BD  
14 Biosciences), CD14 PE-Cy7 (eBioscience) and LIVE/DEAD™ Fixable Near-IR Stain (Invitrogen). For  
15 phenotypic analysis of T cells, the staining mix included the following antibodies: CD3 PerCP-Cy5.5,  
16 PD-1 FITC, CD56 BV605, CD27 BV510, CCR7 BV421, CD103 PE-Cy7, CD25 PE (all Biolegend), CD8  
17 BUV805, CD45RA BUV737, CD4 BUV496, CD69 BUV395 (all BD Biosciences) and LIVE/DEAD™ Fixable  
18 Near-IR Stain. After antibody incubation at RT degrees for 20 min, cells were centrifuged for 4 min at  
19 350 g. Cell pellets were washed twice with FACS buffer. Cells were fixed using the fixation solution of  
20 the anti-human FoxP3 staining Kit (BD Biosciences). After fixation for 30 minutes, cells were washed  
21 twice with FACS buffer, and then once with the permeabilization buffer of the anti-human FoxP3  
22 staining kit. For immune cell subset analysis, cells were stained with anti-FOXP3 APC and for the T  
23 cell phenotype analysis with anti-CD68 APC in permeabilization buffer for 30 minutes. Cell  
24 suspensions were washed twice with permeabilization buffer, taken up in FACS buffer and filtered  
25 using Filcon Syringe-Type 50  $\mu\text{m}$  filters (BD biosciences) right before measurement. Samples from  
26 patients 01–09 were measured on a LSRFortessa flow cytometer and samples from patients 10–20  
27 on a FACSymphony (both BD Biosciences).

### 28 *Immunohistochemistry*

29 Formalin-fixed, paraffin-embedded tumor tissue samples were stained for PD-L1 (clone 22C3,  
30 Agilent) using the Ventana Benchmark Ultra. Membranous PD-L1 expression of any intensity on  
31 viable tumor cells was scored as a percentage of at least 100 tumor cells. The percentage of PD-L1  
32 positive immune cells was scored as the proportion of tumor area that is occupied by PD-L1 staining

1 of immune cells of any intensity and categorized as follows: 0% = IC0, 0% > IC1 < 5% > IC2 < 10% <  
2 IC3.

### 3 *TIL culture*

4 Freshly isolated live cells were cultured in 24 well plates ( $10^6$  cells per well) in T cell culture medium  
5 supplemented with 6000 IU/ml IL-2 for ~2 weeks at 37 °C 5% CO<sub>2</sub>. Medium was refreshed  
6 approximately every 4 days. Wells were split when a monolayer of cells was observed in the entire  
7 well. After this initial culture period, cells were cultured using a standard rapid expansion protocol  
8 (REP) for another two weeks: the culture medium was replaced with T cell culture medium  
9 supplemented with 3000 IU/ml IL-2 and anti-CD3 (clone OKT3; Miltenyi Biotech), also containing 8-  
10  $10 \times 10^6$  irradiated (40 Gray) PBMCs pooled from 10 healthy donors. Cells were passaged when  
11 multiple clusters of dividing T cells were observed, which was usually once or twice during the two-  
12 week REP culture period. The expanded T cells were cryo-preserved in freezing medium.

### 13 *Tumor reactivity assay*

14 Expanded T cells were thawed in RPMI containing 2% FCS at 37°C. Cells were washed twice with T  
15 cell culture medium and centrifugation at 350 g for 5 min. The number of living trypan blue negative  
16 cells was determined using a hemocytometer. Cells were pre-stained in FACS buffer containing CD8  
17 BUV805, CD4 BUV496 and CD3 BUV395 (clone SK7, BD biosciences) for 30 min at 4°C, washed twice  
18 and taken up in T cell culture medium. 100,000 expanded live cells were assayed in T cell culture  
19 medium alone (= medium control) or co-cultured with either thawed tumor or kidney digest  
20 containing 50,000 to 100,000 living cells or exposed to PMA/ionomycin (10 ng/ml PMA, 1 µg/ml  
21 ionomycin). After one hour, Brefeldin A (1:1000, Invitrogen) and 1:1000 monensin (eBioscience)  
22 were added. After six hours, cells were washed with FACS buffer before staining with anti-PD-1  
23 BV421 (BD biosciences), CD154 BV510 (Biolegend) and LIVE/DEAD™ Fixable Near-IR Stain for 30  
24 minutes followed by centrifugation for 4 min at 350 g. Cell pellets were washed twice with FACS  
25 buffer. Cells were fixed using fixation solution (BD, FoxP3 staining kit) for 30 min and washed twice  
26 using FACS buffer. Cells were kept overnight at 4°C, washed with permeabilization buffer and stained  
27 with anti-TNF-α AF488, CD137 PE-Cy7, anti-IFN-γ PE (all Biolegend) and anti-IL-2 APC (Invitrogen) in  
28 permeabilization buffer for 30 min. Cells were washed twice with permeabilization buffer and  
29 analyzed in FACS buffer on a BD FACSymphony.

### 30 *Analysis*

31 Flowjo version 10.1 (Tree Star) was used to analyze flow cytometry data. Further analysis of the  
32 percentages of the stated phenotypes, data transformations, generation of figures and statistical

1 calculations were all performed in R. *P*-values were determined by indicated statistical tests and  
2 depicted using the following symbols:  $p < 0.05 = *$ ,  $p < 0.01 = **$ ,  $p < 0.001 = ***$ , n.s. = not significant.

3

4



## 1 Results

### 2 *Clear cell RCC lesions are highly infiltrated by T cells*

3 To determine the composition of immune cells infiltrating RCC lesions, we collected both tumor and  
4 non-tumor sections from resected kidneys of 18 RCC patients, ranging from Fuhrman grade 1 to 4  
5 and with varying PD-L1 expression on tumor and immune cells (IC) (Table 1). Roughly half of the  
6 patients had received pretreatment with protein tyrosine kinase inhibitors, while the other half were  
7 treatment naive (Table 1). The non-tumor section (hereafter referred to as kidney tissue) was  
8 dissected as spatially distant as possible from the tumor. Single cell suspensions were generated  
9 from the collected tissue by physical disruption and digestion with DNAase and collagenase IV. After  
10 extensive filtration, the number of live cells was determined. The yield of cells per mg tissue derived  
11 from tumor lesions and kidney tissue was similar (Fig. 1A).

12 We next quantified the immune infiltrates by flow cytometry. We measured T cells, monocytes,  
13 macrophages, neutrophils, NK cells, B cells, dendritic cells (DCs) and NKT cells (gating in Fig. S1).  
14 Overall, higher numbers of immune cells were found in tumor lesions compared to paired kidney  
15 tissue (Fig. 1A). Similar to the kidney tissue, T cells constituted the major immune cell subset in RCC  
16 lesions, with an average of  $48 \pm 27\%$  of the immune infiltrate (Fig. 1B; Fig. S2A). Also, monocytes and  
17 macrophages were  $>20\%$  present in the infiltrate in tumor tissue of 6 and 5 patients respectively  
18 (Fig. 1B). The tumor infiltrates contained on average less than 5% of neutrophils, NK cells, B cells,  
19 DCs and NKT cells (Fig. 1B). Interestingly, tumors of the four patients with the lowest percentages of  
20 T cells (patient 02, 09, 13, and 19) also contained the highest percentages of macrophages (Fig. S2B).  
21 Of note, three of these patients were diagnosed with chromophobe RCC (Fig. S2B).

22 The high proportion of T cells in the tumor lesions led us to further explore these immune cell  
23 subsets (gating in Fig. S3A). Overall,  $CD8^+$  T cells were more abundant in tumor lesions than  $CD4^+$   
24 conventional (conv) T cells (Fig. 1C).  $FOXP3^+ CD25^{hi}$  T cells contributed on average  $2.4 \pm 3.2\%$  to the  
25 total T cell population in RCC lesions (Fig 1C). These percentages of  $FOXP3^+$  T cells are substantially  
26 lower than those measured in melanoma or ovarian cancer lesions ( $\sim 15\%$  of  $CD3^+$  T cells).<sup>21</sup>

27 High expression levels of PD-1 (PD-1hi) on  $CD8^+$  T cells in solid tumors is reportedly often indicative  
28 for tumor reactivity.<sup>31</sup> Most RCC infiltrating  $CD8^+$  and  $CD4^+$  conv T cells showed low (PD-1low) or  
29 intermediate PD-1 (PD-1im) expression (Fig. 1D, E). Nevertheless, 6 tumors contained more than 5%  
30 PD-1hi  $CD8^+$  T cells, which in 2 cases (patients 09 and 18) coincided with the presence of PD-1hi  $CD4^+$   
31 conv T cells. In conclusion, high percentages of  $CD8^+$  and  $CD4^+$  conv T cells with variable PD-1  
32 expression levels are present in clear cell RCC lesions.

33

## 1 ***RCC infiltrating T cells display an effector memory phenotype***

2 We next determined the differentiation and activation status of tumor infiltrating T cells compared  
3 to T cells from paired kidney tissue. We analyzed the expression of CD45RA, CD27, CCR7, CD103 and  
4 CD69 to differentiate between naïve, effector and memory subtypes, and of CD25 and PD-1 to  
5 define T cell activation and exhaustion (gating in Fig. S3B). To prevent the inclusion of unreliable  
6 data, all populations included in the PCA contained at least 200 cells. We visualized the relationship  
7 between different patient samples and within patients by applying principal component analysis  
8 (PCA) on the percentage of T cell subtypes and the percentage of activation/exhaustion marker  
9 expression within these T cell subsets (Fig. 2A and B). Distances between T cells from tumor and  
10 kidney samples of individual patients seemed limited (Fig. 2A), suggesting that TILs resemble T cells  
11 from the corresponding kidney more than TILs from other patients. Nonetheless, PC2 potently  
12 separated T cells from tumor and kidney sample groups (Fig. 2B). We therefore examined which  
13 variables contributed most to PC2. Samples with a high PC2 score were enriched for CD27<sup>-</sup>CD45RA<sup>-</sup>  
14 and CCR7<sup>-</sup>CD45RA<sup>-</sup> expressing CD8<sup>+</sup> and CD4<sup>+</sup> conv effector memory T cells (T<sub>EM</sub>) compared to  
15 samples with a low PC2 score, which contained more naïve (CD27<sup>+</sup>CD45RA<sup>+</sup> and CCR7<sup>+</sup>CD45RA<sup>+</sup>)  
16 expressing CD8<sup>+</sup> and CD4<sup>+</sup> conv T cells (Fig. 2C). Specific analyses of these parameters showed that  
17 both CD8<sup>+</sup> and CD4<sup>+</sup> conv T cells in tumor tissue were enriched for the T<sub>EM</sub> phenotype (CD27<sup>-</sup>CD45RA<sup>-</sup>  
18 ) compared to kidney T cells (Fig. 2D and E). Also, naïve CD8<sup>+</sup> T cells (CD27<sup>+</sup>CD45RA<sup>+</sup>) were  
19 significantly reduced in tumors compared to CD8<sup>+</sup> T cells in the kidney (Fig. 2D). In addition, samples  
20 with a low PC2 score were enriched for CD25 expressing CD8<sup>+</sup> and CD4<sup>+</sup> conv T cells (Fig. 2C). Indeed,  
21 tumor-derived CD8<sup>+</sup> T cells and CD4<sup>+</sup> conv T cells (which predominantly exhibit relatively high PC2  
22 scores) had lower percentages of CD25 expression than T cells present in the kidney tissue (Fig. 2F  
23 and G). Although high CD25 expression is a hallmark of FOXP3<sup>+</sup> Tregs, the overall percentage of  
24 infiltrated FOXP3<sup>+</sup> CD25<sup>hi</sup> T cells did not significantly differ between tumor and kidney tissue (Fig.  
25 2H).<sup>32</sup> In conclusion, tumor-infiltrating T cells are enriched for a T<sub>EM</sub> phenotype but have lower CD25  
26 levels compared to T cells isolated from paired kidney tissue.

27

## 28 ***Effective expansion of functionally active RCC TILs***

29 To determine the expansion capacity of RCC TILs, we cultured tumor digests with 6000 IU/ml IL-2 for  
30 14 days, followed by a 14 day rapid expansion protocol (REP)<sup>33</sup> using soluble anti-CD3 antibodies and  
31 3000 IU/ml IL-2. For comparison, we also expanded T cells isolated from kidney tissue. The  
32 expansion rates were similar between kidney- and tumor-derived T cells, suggesting that  
33 immunomodulatory factors that were potentially present in the tumor digest did not substantially  
34 affect the T cell proliferation potential in vitro (Fig. 3A). On average, the ratio of CD4<sup>+</sup> to CD8<sup>+</sup> T cells

1 did not alter significantly upon T cell expansion (Fig. 3B; gating in Fig. S4A). Nonetheless, this ratio  
2 was altered in individual patients during culture (Fig. S4B).

3 Next, we measured the activation potential of the expanded TIL products. We stimulated TILs with  
4 PMA/ionomycin for 6h and measured the expression of the activation markers CD137/4-1BB, and of  
5 CD154/CD40L, two markers that indicate T cell receptor-dependent activation.<sup>34-36</sup> In particular, the  
6 expression of CD137 was substantially induced in expanded CD8<sup>+</sup> and CD4<sup>+</sup> T cells generated from  
7 both kidney and tumor tissue (Fig. 3C; gating in Fig. S4A and C). Furthermore, the key pro-  
8 inflammatory cytokines IFN- $\gamma$ , TNF- $\alpha$  and IL-2 were effectively produced by both kidney and tumor  
9 tissue-derived CD8<sup>+</sup> and CD4<sup>+</sup> T cells (Fig. 3D and E; gating in Fig. S4D). In conclusion, TILs from RCC  
10 lesions could be effectively expanded and were generally able to produce inflammatory cytokines in  
11 response to pharmacological stimulation.

12

### 13 ***Expanded TILs are tumor-reactive***

14 We next tested the tumor reactivity of expanded TILs from 16 RCC lesions and -when available- from  
15 kidney tissue. We co-cultured the TIL products with autologous tumor digests for 6h and measured  
16 the induction of CD137 and CD154. To define the base line CD137 and CD154 expression, we  
17 cultured the expanded TILs in medium alone and exposed them to autologous kidney digests.  
18 Induction of CD154 expression on CD4<sup>+</sup> T cells was scarce in any of the culture conditions (Fig. 4A  
19 and S4E). Conversely, CD137 expression was significantly increased upon co-culture with tumor  
20 digest, in particular in CD8<sup>+</sup> T cells (Fig. 4A and S4F). In fact, in 9 out of 15 analyzed individual  
21 patients (60%), the CD137 expression on TILs was higher upon coculture with tumor tissue digest  
22 than with the autologous kidney tissue digest (Fig. 4B; kidney digest was lacking for patient 05). This  
23 finding indicates that RCC TIL products specifically responded to tumor tissue digests.

24

25 Because tumor reactivity was not detected in all TIL products (Fig. 4B), we asked whether the  
26 presence of tumor reactivity correlated with a particular *ex vivo* immune signature. Therefore, we  
27 compared the tumor immune cell composition to that of the kidney tissue (Fig. S5A). Even though  
28 the immune composition between digests greatly varied between patients, we detected significant  
29 differences in T cell, monocyte, neutrophil, DC and NKT cell content between tumor and kidney  
30 tissues (Fig. S5A). The most prominent of these differences was the reduced relative abundance of  
31 neutrophils in tumor digests (Fig. S5A). Because of the substantial variation and thus patient-specific  
32 immune landscape in RCC and kidney tissue, we calculated the difference between immune  
33 infiltrates in tumor and kidney digest and correlated that to the tumor reactivity of TIL products.  
34 Tumor reactivity was defined as follows: at least one of the individual TIL cultures from a patient

1 showed >5% CD137 expression difference in CD8<sup>+</sup> T cells comparing coculture with tumor digest  
2 versus medium control ( $\Delta$ CD137<sup>hi</sup>) (Fig. 4B, blue line). TIL products with a  $\Delta$ CD137<sup>hi</sup> <5% were  
3 considered 'not reactive'. We then correlated the reactive and non-reactive groups to changes in  
4 immune cell infiltration between tumor and kidney tissue. We found that tumor-reactive TIL  
5 products were more often derived from tumor tissues that contained increased infiltrates of T cells,  
6 NKT cells, B cells, and/or a loss of neutrophils (Fig. S5B). Of note, the percentages of these immune  
7 subsets just in tumor digests (Fig. 1B) lacked a significant correlation with tumor reactivity (Fig. S5C).  
8 Likewise, the percentage of tumor-infiltrating CD8<sup>+</sup> T cells, CD4<sup>+</sup> conv T cells, FOXP3<sup>+</sup> CD25<sup>hi</sup> T cells  
9 (Fig. 1C), the percentage of PD-1<sup>hi</sup> T cells (Fig. 1D and E) and the tumor or immune cell PD-L1  
10 expression (Table 1) did not correlate with tumor reactivity (Fig. S6A-C).

11  
12 As the PCA of T cell infiltrates derived from tumor and kidney tissue showed key differences in the  
13 memory phenotype and the percentage of CD25 expressing CD8<sup>+</sup> and CD4<sup>+</sup> conv T cells (Fig. 2A-G),  
14 we also investigated whether these parameters correlated with the tumor reactivity of TIL products.  
15 The differentiation status of CD8<sup>+</sup> and CD4<sup>+</sup> conv T cells in tumor digests, whether or not in relation  
16 to kidney tissue, did not correlate with tumor reactivity of the in vitro expanded TIL product (Fig. S7A  
17 and B). The percentage of CD25 expressing T cells correlated with tumor reactivity of the TIL product  
18 only within the tumor-infiltrating CD8<sup>+</sup> T cell population (Fig. S7C and D). Thus, increased T cell  
19 numbers that include CD25-expressing CD8<sup>+</sup> T cells in the tumor tissue indicated an increased  
20 likelihood of generating tumor-reactive TIL products.

21

### 22 ***Expanded tumor-reactive TILs fail to produce cytokines***

23 Because effective TIL therapy requires cytokine-producing TIL products<sup>29</sup>, we examined whether  
24 expanded TILs also had the capacity to produce the key pro-inflammatory cytokines IFN- $\gamma$ , TNF- $\alpha$ ,  
25 and IL-2 when exposed to tumor tissue digest. Strikingly, even though PMA/ionomycin activation of  
26 TIL products showed the capacity of TIL products to produce high levels of IFN- $\gamma$ , TNF- $\alpha$ , and IL-2  
27 (Fig. 3D), and even though CD137 expression was clearly induced in TIL products from 10 out of 16  
28 patients when exposed to autologous tumor digest (Fig. 4A and B), we failed to detect tumor-specific  
29 production of these three cytokines in both the CD8<sup>+</sup> and the CD4<sup>+</sup> T cells (Fig. 4C). In conclusion,  
30 even though tumor-reactive T cells in RCC lesions can be effectively expanded and produce cytokines  
31 after stimulation with pharmacological reagents, they fail to produce pro-inflammatory cytokines in  
32 response to tumor digests.

## 1 Discussion

2 In this study, we show that TILs from RCC lesions can be effectively expanded with a standard REP.  
3 From 9 out of 16 patients (56%), TIL products contained tumor-reactive T cells as defined by the  
4 induction of tumor-specific CD137 expression. Our results are in the same range as seen in previous  
5 studies, although comparisons are complicated because of study-specific differences in  
6 methodology.<sup>25-27</sup> The patient group we analyzed here contained RCC lesions from pretreated and  
7 treatment-naïve patients. While the study group is too small for firm conclusions, a clear relation  
8 between pretreatment and TIL expansion or tumor reactivity of the TIL product was absent.

9  
10 Whether a tumor-reactive TIL product can be developed may depend on the composition of the  
11 tumor immune infiltrate. The comparison of the tumor immune landscape with that of non-tumor  
12 tissue from the same patient allowed us to identify tumor-specific infiltrations. Here we show that  
13 an enrichment of T cells in RCC compared to autologous kidney tissue positively correlated with the  
14 presence of tumor-reactive T cells in the TIL products. This is in apparent accordance with data in  
15 colon and ovarian tumors showing a positive association between high tumor T cell infiltration and  
16 clinical outcome.<sup>37-39</sup> In addition, high expression of the activation markers PD-1, CD69 and CD25 on  
17 primary TILs is an important indicator for the percentage of tumor-reactive T cells and therapeutic  
18 response in NSCLC.<sup>21,31</sup> In the current study, we only found that the presence of CD25-expressing  
19 CD8<sup>+</sup> TILs correlated with tumor reactivity of expanded TILs.

20 Also, an increased presence of B cells in tumor lesions compared to paired kidney tissue associated  
21 with the occurrence of tumor-reactive T cells in TIL products. B cells are indicative for the presence  
22 of tertiary lymphoid structures, which are thought to drive anti-tumor immunity.<sup>40</sup> In line with this, B  
23 cell signatures are enriched in responders to immune checkpoint blockade compared to non-  
24 responders in RCC, sarcoma and melanoma.<sup>40,41</sup> Finally, a reduction of neutrophils in RCC lesions  
25 compared to paired kidney tissue correlated with increased tumor reactivity of expanded TIL  
26 products. Although only present in small numbers, it is tempting to speculate that neutrophils  
27 interfere with the functional potential of tumor-reactive T cells, especially because low neutrophil to  
28 lymphocyte ratios in RCC positively correlate with clinical anti-PD-1 therapy responses.<sup>42</sup> Overall, we  
29 show that the composition of the tumor specific immune infiltrate in all likelihood determines the  
30 potential to generate a TIL product containing tumor-reactive T cells.

31 Although we found CD137-expressing tumor-reactive T cells, they generally failed to produce  
32 cytokines after stimulation with autologous RCC. Other pioneering studies reporting tumor reactivity  
33 of expanded RCC TILs showed low cytokine production and lacked thorough polyfunctional

1 analyses.<sup>25-27</sup> Differences between these and our studies are likely caused by the specific isolation  
2 and stimulation protocols. Intriguingly, with the identical protocol as we used here, we generated  
3 clinical-grade melanoma TILs at our facilities that readily produce effector cytokines against  
4 autologous tumor digest.<sup>33</sup> Similarly, 76% of our NSCLC-derived TIL products showed tumor-specific  
5 cytokine responses to autologous tumors, of which 25% was even polyfunctional.<sup>21</sup> Thus, the lack of  
6 tumor-specific cytokine production we observed for RCC-derived TIL products is tumor-type specific.  
7 The absence of tumor-specific cytokine production could not be attributed to an overall inability to  
8 produce these cytokines, as the RCC TILs produced ample amounts upon stimulation with  
9 PMA/ionomycin. Hence, what are the underlying mechanisms for the lack of cytokine production by  
10 RCC-derived TILs in response to tumor digests? A lack of cytokine production may have been  
11 imposed during the tumor reactivity assay by immune cells that include suppressive T cell  
12 populations or myeloid-derived suppressor cells (MDSCs). Even though we did not find a significant  
13 correlation of *ex vivo* CD4<sup>+</sup>FOXP3<sup>+</sup>CD25<sup>hi</sup> cells with tumor reactivity, this T cell subset could be  
14 strongly suppressive.<sup>43,44</sup> Alternatively, RCC-resident CD25-expressing CD4<sup>+</sup>FOXP3<sup>-</sup> T cells can  
15 produce IL-10 and correlate with worse patient survival.<sup>45</sup> In addition, abundantly present MDSCs in  
16 RCC negatively affect TIL outgrowth, and potentially interfere with immunotherapy.<sup>28</sup> Furthermore,  
17 non-immune cells such as tumor cells or stromal cells often harbor the capacity to suppress  
18 functional T cell responses to tumor digest.<sup>46</sup> For example, surface PD-L1 is one of the known key  
19 molecules to suppress anti-tumor recognition, and was expressed by tumor cells in some RCC lesions  
20 in this study. Alternatively, an immunosuppressive environment could hinder the re-programming of  
21 dysfunctional T cells to gain a pro-inflammatory profile. Because PMA/ionomycin activation induced  
22 strong responses, we consider this possibility unlikely. Nevertheless, it is conceivable that signaling  
23 nodules engaged upon TCR-HLA complex interaction that are required for cytokine production, but  
24 not for CD137 induction, may not have been completely rewired during the TIL cultures. Further  
25 investigations should reveal whether the generation of RCC-derived TIL products would benefit from  
26 the upfront removal of any or all of these immune suppressive cells.

27 In addition to the conclusions of other pioneering studies on opportunities of TIL therapy for the  
28 treatment of RCC,<sup>25-27</sup> we recommend that TIL generation from RCC first requires a thorough  
29 mechanistic understanding of the RCC TIL dysfunction before application to patients. Moreover, the  
30 lack of functionality of RCC TILs may have contributed to the failure of their clinical application in the  
31 late 90s.<sup>47</sup> As of writing, we could only find one active TIL clinical trial for RCC in the ClinicalTrials.gov  
32 database.<sup>48</sup> In contrast, multiple checkpoint inhibitor trials are ongoing, further emphasizing the  
33 current relative lack of knowledge to design effective TIL therapy for RCC.<sup>49-51</sup>

1 In conclusion, we successfully expanded tumor-reactive TILs from RCC patients, but further  
2 elucidation of molecular and cellular suppressive pathways in RCC is needed to restore their tumor-  
3 specific cytokine production.

4

## 1 **Acknowledgments**

2 We thank the flow cytometry facility of Sanquin Research, and the medical assistance staff from The  
3 Netherlands Cancer Institute – Antoni van Leeuwenhoek hospital (Amsterdam) for technical help.

4 This work was supported by intramural funding of Stichting Sanquin Bloedvoorziening (PPOC 14-46).

5



## 1    **References**

- 2    1. Hsieh JJ, Purdue MP, Signoretti S, Swanton C, Albiges L, Schmidinger M, Heng DY, Larkin J, Ficarra  
3    V. Renal cell carcinoma. *Nat. Rev. Dis. Prim.* 2017;3:17009. doi:10.1038/nrdp.2017.9
- 4    2. Andersen R, Donia M, Westergaard MCW, Pedersen M, Hansen M, Svane IM. Tumor infiltrating  
5    lymphocyte therapy for ovarian cancer and renal cell carcinoma. *Hum. Vaccines Immunother.*  
6    2015;11(12):2790–2795. doi:10.1080/21645515.2015.1075106
- 7    3. McDermott DF, Regan MM, Clark JI, Flaherty LE, Weiss GR, Logan TF, Kirkwood JM, Gordon MS,  
8    Sosman JA, Ernstoff MS, et al. Randomized Phase III Trial of High-Dose Interleukin-2 Versus  
9    Subcutaneous Interleukin-2 and Interferon in Patients With Metastatic Renal Cell Carcinoma. *J. Clin.*  
10    *Oncol.* 2005;23(1):133–141. doi:10.1200/JCO.2005.03.206
- 11    4. Fyfe G, Fisher RI, Rosenberg SA, Sznol M, Parkinson DR, Louie AC. Results of treatment of 255  
12    patients with metastatic renal cell carcinoma who received high-dose recombinant interleukin-2  
13    therapy. *J. Clin. Oncol.* 1995;13(3):688–696. doi:10.1200/JCO.1995.13.3.688
- 14    5. Buchbinder EI, Dutcher JP, Daniels GA, Curti BD, Patel SP, Holtan SG, Miletello GP, Fishman MN,  
15    Gonzalez R, Clark JI, et al. Therapy with high-dose Interleukin-2 (HD IL-2) in metastatic melanoma  
16    and renal cell carcinoma following PD1 or PDL1 inhibition. *J. Immunother. cancer.* 2019;7(1):49.  
17    doi:10.1186/s40425-019-0522-3
- 18    6. Childs R, Chernoff A, Contentin N, Bahceci E, Schrupp D, Leitman S, Read EJ, Tisdale J, Dunbar C,  
19    Linehan WM, et al. Regression of metastatic renal-cell carcinoma after nonmyeloablative allogeneic  
20    peripheral-blood stem-cell transplantation. *N. Engl. J. Med.* 2000;343(11):750–8.  
21    doi:10.1056/NEJM200009143431101
- 22    7. Bregni M, Doderio A, Peccatori J, Pescarollo A, Bernardi M, Sassi I, Voena C, Zaniboni A, Bordignon  
23    C, Corradini P. Nonmyeloablative conditioning followed by hematopoietic cell allografting and donor  
24    lymphocyte infusions for patients with metastatic renal and breast cancer. *Blood.* 2002;99(11):4234–  
25    6. doi:10.1182/blood.v99.11.4234
- 26    8. Artz AS, Kocherginsky M, Van Besien K. Order of patient entry influences outcome for metastatic  
27    renal cell cancer after non-myeloablative allogeneic stem cell transplantation. *Br. J. Haematol.*  
28    2006;132(6):747–54. doi:10.1111/j.1365-2141.2005.05923.x
- 29    9. Artz AS, Van Besien K, Zimmerman T, Gajewski TF, Rini BI, Hu HS, Stadler WM, Vogelzang NJ. Long-  
30    term follow-up of nonmyeloablative allogeneic stem cell transplantation for renal cell carcinoma:  
31    The University of Chicago Experience. *Bone Marrow Transplant.* 2005;35(3):253–260.

- 1    doi:10.1038/sj.bmt.1704760
- 2    10. Rini BI, Halabi S, Barrier R, Margolin KA, Avigan D, Logan T, Stadler WM, McCarthy PL, Linker CA,  
3    Small EJ, et al. Adoptive Immunotherapy by Allogeneic Stem Cell Transplantation for Metastatic  
4    Renal Cell Carcinoma: A CALGB Intergroup Phase II Study. *Biol. Blood Marrow Transplant.*  
5    2006;12(7):778–785. doi:10.1016/j.bbmt.2006.03.011
- 6    11. Geissler K, Fornara P, Lautenschläger C, Holzhausen H-J, Seliger B, Riemann D. Immune signature  
7    of tumor infiltrating immune cells in renal cancer. *Oncoimmunology.* 2015;4(1):e985082.  
8    doi:10.4161/2162402X.2014.985082
- 9    12. Nakano O, Sato M, Naito Y, Suzuki K, Orikasa S, Aizawa M, Suzuki Y, Shintaku I, Nagura H, Ohtani  
10    H. Proliferative activity of intratumoral CD8(+) T-lymphocytes as a prognostic factor in human renal  
11    cell carcinoma: clinicopathologic demonstration of antitumor immunity. *Cancer Res.*  
12    2001;61(13):5132–6.
- 13    13. Motzer RJ, Tannir NM, McDermott DF, Arén Frontera O, Melichar B, Choueiri TK, Plimack ER,  
14    Barthélémy P, Porta C, George S, et al. Nivolumab plus Ipilimumab versus Sunitinib in Advanced  
15    Renal-Cell Carcinoma. *N. Engl. J. Med.* 2018;378(14):1277–1290. doi:10.1056/NEJMoa1712126
- 16    14. Rini BI, Plimack ER, Stus V, Gafanov R, Hawkins R, Nosov D, Pouliot F, Alekseev B, Soulières D,  
17    Melichar B, et al. Pembrolizumab plus Axitinib versus Sunitinib for Advanced Renal-Cell Carcinoma.  
18    *N. Engl. J. Med.* 2019;380(12):1116–1127. doi:10.1056/NEJMoa1816714
- 19    15. Besser MJ, Shapira-Frommer R, Itzhaki O, Treves AJ, Zippel DB, Levy D, Kubi A, Shoshani N, Zikich  
20    D, Ohayon Y, et al. Adoptive Transfer of Tumor-Infiltrating Lymphocytes in Patients with Metastatic  
21    Melanoma: Intent-to-Treat Analysis and Efficacy after Failure to Prior Immunotherapies. *Clin. Cancer*  
22    *Res.* 2013;19(17):4792–4800. doi:10.1158/1078-0432.CCR-13-0380
- 23    16. Rosenberg SA, Yang JC, Sherry RM, Kammula US, Hughes MS, Phan GQ, Citrin DE, Restifo NP,  
24    Robbins PF, Wunderlich JR, et al. Durable complete responses in heavily pretreated patients with  
25    metastatic melanoma using T-cell transfer immunotherapy. *Clin. Cancer Res.* 2011;17(13):4550–  
26    4557. doi:10.1158/1078-0432.CCR-11-0116
- 27    17. Andersen R, Donia M, Ellebaek E, Borch TH, Kongsted P, Iversen TZ, Hölmich LR, Hendel HW, Met  
28    Ö, Andersen MH, et al. Long-Lasting Complete Responses in Patients with Metastatic Melanoma  
29    after Adoptive Cell Therapy with Tumor-Infiltrating Lymphocytes and an Attenuated IL2 Regimen.  
30    *Clin. Cancer Res.* 2016;22(15):3734–3745. doi:10.1158/1078-0432.CCR-15-1879
- 31    18. Sarnaik A, Khushalani NI, Chesney JA, Kluger HM, Curti BD, Lewis KD, Thomas SS, Whitman ED,

- 1 Hamid O, Lutzky J, et al. Safety and efficacy of cryopreserved autologous tumor infiltrating  
2 lymphocyte therapy (LN-144, lifileucel) in advanced metastatic melanoma patients who progressed  
3 on multiple prior therapies including anti-PD-1. *J. Clin. Oncol.* 2019;37(15\_suppl):2518.  
4 doi:10.1200/JCO.2019.37.15\_suppl.2518
- 5 19. Deniger DC, Pasetto A, Robbins PF, Gartner JJ, Prickett TD, Paria BC, Malekzadeh P, Jia L, Yossef  
6 R, Langan MM, et al. T-cell Responses to *TP53* “Hotspot” Mutations and Unique Neoantigens  
7 Expressed by Human Ovarian Cancers. *Clin. Cancer Res.* 2018;24(22):5562–5573. doi:10.1158/1078-  
8 0432.CCR-18-0573
- 9 20. Ben-Avi R, Farhi R, Ben-Nun A, Gorodner M, Greenberg E, Markel G, Schachter J, Itzhaki O, Besser  
10 MJ. Establishment of adoptive cell therapy with tumor infiltrating lymphocytes for non-small cell  
11 lung cancer patients. *Cancer Immunol. Immunother.* 2018;67(8):1221–1230. doi:10.1007/s00262-  
12 018-2174-4
- 13 21. De Groot R, Van Loenen MM, Guislain A, Nicolet BP, Freen-Van Heeren JJ, Verhagen OJHM, Van  
14 Den Heuvel MM, De Jong J, Burger P, Van Der Schoot CE, et al. Polyfunctional tumor-reactive T cells  
15 are effectively expanded from non-small cell lung cancers, and correlate with an immune-engaged T  
16 cell profile. *Oncoimmunology.* 2019;8(11):e1648170. doi:10.1080/2162402X.2019.1648170
- 17 22. Tran E, Turcotte S, Gros A, Robbins PF, Lu Y-C, Dudley ME, Wunderlich JR, Somerville RP, Hogan  
18 K, Hinrichs CS, et al. Cancer immunotherapy based on mutation-specific CD4+ T cells in a patient with  
19 epithelial cancer. *Science.* 2014;344:641–5. doi:10.1126/science.1251102
- 20 23. Tran E, Robbins PF, Lu Y-C, Prickett TD, Gartner JJ, Jia L, Pasetto A, Zheng Z, Ray S, Groh EM, et al.  
21 T-Cell Transfer Therapy Targeting Mutant KRAS in Cancer. *N. Engl. J. Med.* 2016;375(23):2255–2262.  
22 doi:10.1056/NEJMoa1609279
- 23 24. Zacharakis N, Chinnasamy H, Black M, Xu H, Lu Y-C, Zheng Z, Pasetto A, Langan M, Shelton T,  
24 Prickett T, et al. Immune recognition of somatic mutations leading to complete durable regression in  
25 metastatic breast cancer. *Nat. Med.* 2018;24(6):724–730. doi:10.1038/s41591-018-0040-8
- 26 25. Andersen R, Westergaard MCW, Kjeldsen JW, Müller A, Pedersen NW, Hadrup SR, Met Ö, Seliger  
27 B, Kromann-Andersen B, Hasselager T, et al. T-cell Responses in the Microenvironment of Primary  
28 Renal Cell Carcinoma-Implications for Adoptive Cell Therapy. *Cancer Immunol. Res.* 2018;6(2):222–  
29 235. doi:10.1158/2326-6066.CIR-17-0467
- 30 26. Markel G, Cohen-Sinai T, Besser MJ, Oved K, Itzhaki O, Seidman R, Fridman E, Treves AJ, Keisari Y,  
31 Dotan Z, et al. Preclinical evaluation of adoptive cell therapy for patients with metastatic renal cell

- 1 carcinoma. *Anticancer Res.* 2009;29(1):145–54.
- 2 27. Baldan V, Griffiths R, Hawkins RE, Gilham DE. Efficient and reproducible generation of tumour-  
3 infiltrating lymphocytes for renal cell carcinoma. *Br. J. Cancer.* 2015;112(9):1510–8.  
4 doi:10.1038/bjc.2015.96
- 5 28. Guislain A, Gadiot J, Kaiser A, Jordanova ES, Broeks A, Sanders J, van Boven H, de Gruijl TD,  
6 Haanen JBAG, Bex A, et al. Sunitinib pretreatment improves tumor-infiltrating lymphocyte expansion  
7 by reduction in intratumoral content of myeloid-derived suppressor cells in human renal cell  
8 carcinoma. *Cancer Immunol. Immunother.* 2015;64(10):1241–50. doi:10.1007/s00262-015-1735-z
- 9 29. Donia M, Kjeldsen JW, Andersen R, Westergaard MCW, Bianchi V, Legut M, Attaf M, Szomolay B,  
10 Ott S, Dolton G, et al. PD-1+ Polyfunctional T Cells Dominate the Periphery after Tumor-Infiltrating  
11 Lymphocyte Therapy for Cancer. *Clin. Cancer Res.* 2017;23(19):5779–5788. doi:10.1158/1078-  
12 0432.CCR-16-1692
- 13 30. Wimmers F, Aarntzen EHJG, Duiveman-deBoer T, Figdor CG, Jacobs JFM, Tel J, de Vries IJM. Long-  
14 lasting multifunctional CD8<sup>+</sup> T cell responses in end-stage melanoma patients can be induced by  
15 dendritic cell vaccination. *Oncoimmunology.* 2016;5(1):e1067745.  
16 doi:10.1080/2162402X.2015.1067745
- 17 31. Thommen DS, Koelzer VH, Herzig P, Roller A, Trefny M, Dimeloe S, Kiialainen A, Hanhart J, Schill  
18 C, Hess C, et al. A transcriptionally and functionally distinct PD-1+ CD8+ T cell pool with predictive  
19 potential in non-small-cell lung cancer treated with PD-1 blockade. *Nat. Med.* 2018;24(7):994–1004.  
20 doi:10.1038/s41591-018-0057-z
- 21 32. Fontenot JD, Gavin MA, Rudensky AY. Foxp3 programs the development and function of  
22 CD4+CD25+ regulatory T cells. *Nat. Immunol.* 2003;4(4):330–336. doi:10.1038/ni904
- 23 33. Rohaan MW, van den Berg JH, Kvistborg P, Haanen JBAG. Adoptive transfer of tumor-infiltrating  
24 lymphocytes in melanoma: a viable treatment option. *J. Immunother. cancer.* 2018;6(1):102.  
25 doi:10.1186/s40425-018-0391-1
- 26 34. Wolfi M, Kuball J, Ho WY, Nguyen H, Manley TJ, Bleakley M, Greenberg PD. Activation-induced  
27 expression of CD137 permits detection, isolation, and expansion of the full repertoire of CD8+ T cells  
28 responding to antigen without requiring knowledge of epitope specificities. *Blood.* 2007;110(1):201–  
29 10. doi:10.1182/blood-2006-11-056168
- 30 35. Ye Q, Song D-G, Poussin M, Yamamoto T, Best A, Li C, Coukos G, Powell DJ. CD137 Accurately  
31 Identifies and Enriches for Naturally Occurring Tumor-Reactive T Cells in Tumor. *Clin. Cancer Res.*

- 1 2014;20(1):44–55. doi:10.1158/1078-0432.CCR-13-0945
- 2 36. Frentsch M, Arbach O, Kirchhoff D, Moewes B, Worm M, Rothe M, Scheffold A, Thiel A. Direct  
3 access to CD4+ T cells specific for defined antigens according to CD154 expression. *Nat. Med.*  
4 2005;11(10):1118–1124. doi:10.1038/nm1292
- 5 37. Mlecnik B, Bindea G, Angell HK, Maby P, Angelova M, Tougeron D, Church SE, Lafontaine L,  
6 Fischer M, Fredriksen T, et al. Integrative Analyses of Colorectal Cancer Show Immunoscore Is a  
7 Stronger Predictor of Patient Survival Than Microsatellite Instability. *Immunity*. 2016;44(3):698–711.  
8 doi:10.1016/j.immuni.2016.02.025
- 9 38. Zhang L, Conejo-Garcia JR, Katsaros D, Gimotty PA, Massobrio M, Regnani G, Makrigiannakis A,  
10 Gray H, Schlienger K, Liebman MN, et al. Intratumoral T cells, recurrence, and survival in epithelial  
11 ovarian cancer. *N. Engl. J. Med.* 2003;348(3):203–13. doi:10.1056/NEJMoa020177
- 12 39. Bindea G, Mlecnik B, Tosolini M, Kirilovsky A, Waldner M, Obenauf AC, Angell H, Fredriksen T,  
13 Lafontaine L, Berger A, et al. Spatiotemporal dynamics of intratumoral immune cells reveal the  
14 immune landscape in human cancer. *Immunity*. 2013;39(4):782–95.  
15 doi:10.1016/j.immuni.2013.10.003
- 16 40. Helmink BA, Reddy SM, Gao J, Zhang S, Basar R, Thakur R, Yizhak K, Sade-Feldman M, Blando J,  
17 Han G, et al. B cells and tertiary lymphoid structures promote immunotherapy response. *Nature*.  
18 2020;577(7791):549–555. doi:10.1038/s41586-019-1922-8
- 19 41. Petitprez F, de Reyniès A, Keung EZ, Chen TWW, Sun CM, Calderaro J, Jeng YM, Hsiao LP, Lacroix  
20 L, Bougouïn A, et al. B cells are associated with survival and immunotherapy response in sarcoma.  
21 *Nature*. 2020;577(7791):556–560. doi:10.1038/s41586-019-1906-8
- 22 42. Jeyakumar G, Kim S, Bumma N, Landry C, Silski C, Suisham S, Dickow B, Heath E, Fontana J,  
23 Vaishampayan U. Neutrophil lymphocyte ratio and duration of prior anti-angiogenic therapy as  
24 biomarkers in metastatic RCC receiving immune checkpoint inhibitor therapy. *J. Immunother.*  
25 *cancer*. 2017;5(1):82. doi:10.1186/s40425-017-0287-5
- 26 43. Asma G, Amal G, Raja M, Amine D, Mohammed C, Amel BAE. Comparison of circulating and  
27 intratumoral regulatory T cells in patients with renal cell carcinoma. *Tumour Biol*. 2015;36(5):3727–  
28 34. doi:10.1007/s13277-014-3012-8
- 29 44. Zhu G, Pei L, Yin H, Lin F, Li X, Zhu X, He W, Gou X. Profiles of tumor-infiltrating immune cells in  
30 renal cell carcinoma and their clinical implications. *Oncol. Lett.* 2019;18(5):5235–5242.  
31 doi:10.3892/ol.2019.10896

- 1 45. Siddiqui SA, Frigola X, Bonne-Annee S, Mercader M, Kuntz SM, Krambeck AE, Sengupta S, Dong  
2 H, Chevillat JC, Lohse CM, et al. Tumor-Infiltrating Foxp3-CD4+CD25+ T Cells Predict Poor Survival in  
3 Renal Cell Carcinoma. *Clin. Cancer Res.* 2007;13(7):2075–2081. doi:10.1158/1078-0432.CCR-06-2139
- 4 46. Errarte P, Larrinaga G, López JI. The role of cancer-associated fibroblasts in renal cell carcinoma.  
5 An example of tumor modulation through tumor/non-tumor cell interactions. *J. Adv. Res.*  
6 2020;21:103–108. doi:10.1016/J.JARE.2019.09.004
- 7 47. Figlin RA, Thompson JA, Bukowski RM, Vogelzang NJ, Novick AC, Lange P, Steinberg GD,  
8 Belldegrun AS. Multicenter, randomized, phase III trial of CD8(+) tumor-infiltrating lymphocytes in  
9 combination with recombinant interleukin-2 in metastatic renal cell carcinoma. *J. Clin. Oncol.*  
10 1999;17(8):2521–9. doi:10.1200/JCO.1999.17.8.2521
- 11 48. ClinicalTrials.gov. Identifier NCT02926053, TIL Therapy for Metastatic Renal Cell Carcinoma.  
12 [accessed December 1, 2019]. <https://clinicaltrials.gov/ct2/show/NCT02926053>
- 13 49. ClinicalTrials.gov. Identifier NCT03229278, Trigriluzole With Nivolumab and Pembrolizumab in  
14 Treating Patients With Metastatic or Unresectable Solid Malignancies or Lymphoma. [accessed  
15 December 1, 2019]. <https://clinicaltrials.gov/ct2/show/NCT03229278>
- 16 50. ClinicalTrials.gov. Identifier NCT03549000, A Phase I/Ib Study of NZV930 Alone and in  
17 Combination With PDR001 and /or NIR178 in Patients With Advanced Malignancies.  
18 <https://clinicaltrials.gov/ct2/show/NCT03549000>
- 19 51. ClinicalTrials.gov. Identifier NCT03311334, A Study of DSP-7888 Dosing Emulsion in Combination  
20 With Immune Checkpoint Inhibitors in Adult Subjects With Advanced Solid Tumors. [accessed  
21 December 1, 2019]. <https://clinicaltrials.gov/ct2/show/NCT03311334>

## 22 **Figure legends**

### 23 ***Fig 1. T cells are enriched in RCC lesions***

24 **A.** Tissue from RCC lesions and distal non-tumor kidney tissue was collected from 18 RCC patients.  
25 The number of living cells in single cell suspensions were determined using trypan blue (left panel).  
26 The number of T cells, monocytes, macrophages, neutrophils, natural killer (NK) cells, B cells,  
27 dendritic cells (DCs) and NKT cells were determined by flow cytometry. Collectively these cell types  
28 are defined as immune cells (middle panel). Statistical significance was determined by Wilcoxon  
29 signed-rank test. Right panel: Patient color coding and sample shape coding, which is used  
30 throughout all figures. **B.** Percentage of indicated immune cell subsets of the total immune cells in  
31 tumor digests. **C.** T cell subsets as a percentage of total CD3<sup>+</sup> T cells in the tumor digest as

1 determined by flow cytometry. CD4<sup>+</sup> conventional (conv) T cells are defined as non-FOXP3<sup>+</sup>CD25<sup>hi</sup>  
2 (see Fig. S3). **D.** Gating strategy (left panel) of two representative patients to define high (hi),  
3 intermediate (im) and low (lo) PD-1 expression in tumor-infiltrating CD8<sup>+</sup> T cells and summary (right  
4 panel). **E.** Similar gating was used for CD4<sup>+</sup> conv T cells (E).

5

1 **Fig 2. RCC-derived T cells are phenotypically different from kidney T cells**

2 **A-B.** The activation and memory profiles of CD8<sup>+</sup>, CD4<sup>+</sup> conv T cells and CD4<sup>+</sup>FOXP3<sup>+</sup>CD25<sup>hi</sup> cells were  
3 determined by flow cytometry. These profiles included three PD-1 levels (low, intermediate, high),  
4 CD25 expression, CD103<sup>+</sup>CCR7<sup>-</sup>, CD103<sup>-</sup>CCR7<sup>-</sup>, and all combinations of CD27/CD45RA, CCR7/CD45RA  
5 and CD103/CD69 (see Fig. S3). Dimensions of these data were reduced using principal component  
6 analysis (PCA). The first two principal components (PC) are shown as colored by sample type (**A**) and  
7 by patient (**B**). **C.** The ten phenotypes that contributed most to variance in PC2. Colors indicate  
8 whether a phenotype was observed in CD4<sup>+</sup> conv T cells (red) or CD8<sup>+</sup> T cells (blue). **D.** Left panel:  
9 gating for memory phenotypes in CD8<sup>+</sup> T cells. Middle and right panels: effector memory and naïve T  
10 cell percentages within CD8<sup>+</sup> T cells. **E.** As in **D**, but then for CD4<sup>+</sup> conv T cells. **F.** CD25 expression  
11 gating (left panel) and quantification (right panel) for CD8<sup>+</sup> T cells. **G.** As in **F**, for CD4<sup>+</sup> conv T cells. **H.**  
12 Percentage of CD4<sup>+</sup>FOXP3<sup>+</sup>CD25<sup>hi</sup> cells in CD3<sup>+</sup> T cells. For **D-H** only paired samples were plotted.  
13 Statistical significance in panels **A** and **D-H** was determined by Wilcoxon signed-rank test.

14



1 **Fig 3. Expanded RCC TILs are capable cytokine producers**

2 Tumor and kidney digests were cultured for two weeks in 6000 IU/ml IL-2, followed by two weeks of  
3 REP. **A.** Fold change of number of T cells post-REP compared to *ex vivo*. **B.** Fraction of CD8<sup>+</sup> and CD4<sup>+</sup>  
4 T cells from kidney (left panel) and RCC (right panel) *ex vivo* and post-REP (individual datapoints in  
5 Fig. S4B). **C-E.** Post-REP TILs were re-stimulated with PMA/ionomycin for 6 h and analyzed for  
6 expression of intracellular CD137 and surface CD154 (**C**), expression of intracellular cytokines in  
7 CD8<sup>+</sup> T cells (**D**) and in CD4<sup>+</sup> T cells in (**E**). Statistical significance was determined by Wilcoxon signed-  
8 rank test for panels **A** and **B** and by ANOVA with Tukey's post hoc test for panels **C-E**.

9

1 **Fig 4. RCC TILs are tumor-reactive but do not produce key cytokines**

2 Post-REP TILs were first stained for CD3, CD4 and CD8, then cultured in medium with or without  
3 autologous kidney or autologous tumor digests and analyzed by flow cytometry for CD137, CD154,  
4 IFN- $\gamma$ , TNF- $\alpha$  or IL-2 after 6h of coculture. **A.** Intracellular CD137 and surface CD154 expression,  
5 representative examples (left panels) and summary of quantifications (right panels). **B.** The  
6 difference ( $\Delta$ , Delta) in high CD137 (CD137hi) expression between co-culture of TILs with tissue  
7 digest and medium control (tissue digest – medium). TIL products with  $\Delta$ CD137hi > 5% (blue line) in  
8 CD8<sup>+</sup> T cells against tumor digests were considered tumor-reactive. Patients from which tumor-  
9 reactive TIL products were produced according to these criteria are enframed. **C.** Intracellular IFN- $\gamma$ ,  
10 TNF- $\alpha$  or IL-2 expression, representative examples (left panels) and summary of quantifications (right  
11 panels). Statistical significance was determined by ANOVA with Tukey's post hoc test for panels **A**  
12 and **C**. Replicates are separately cultured and tested TIL products.

**Fig. 1**

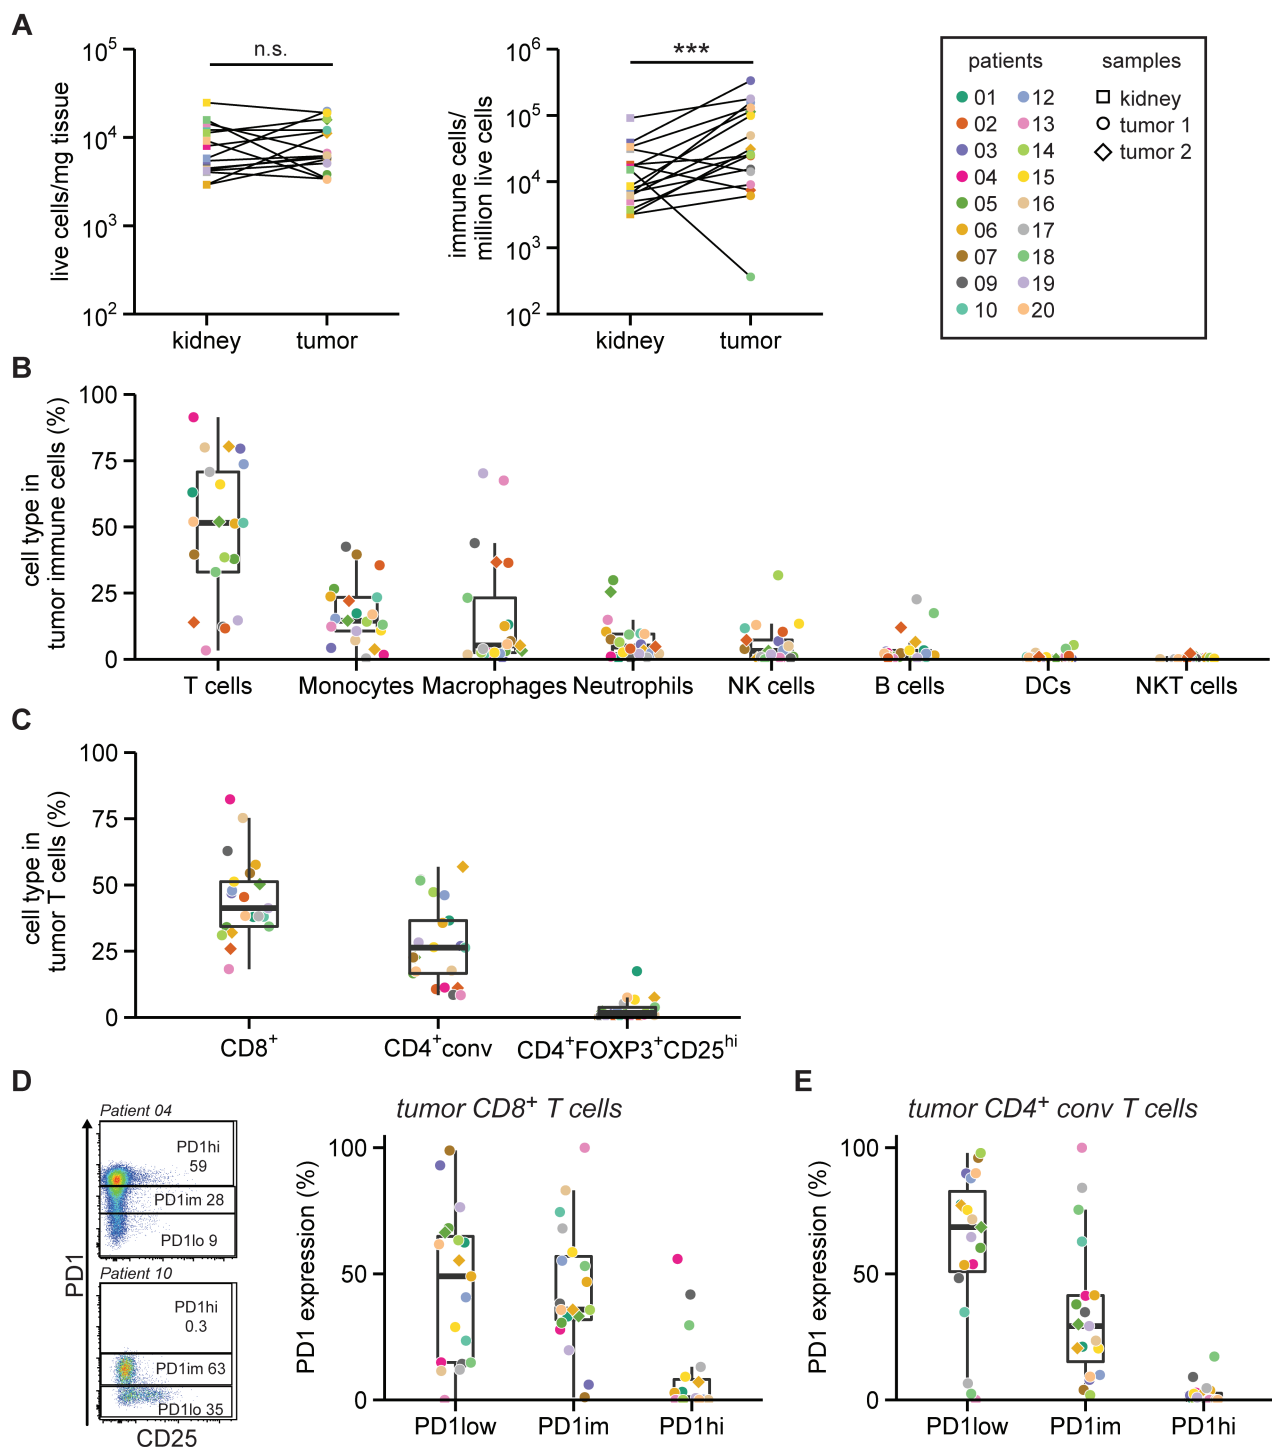

**Fig. 2**

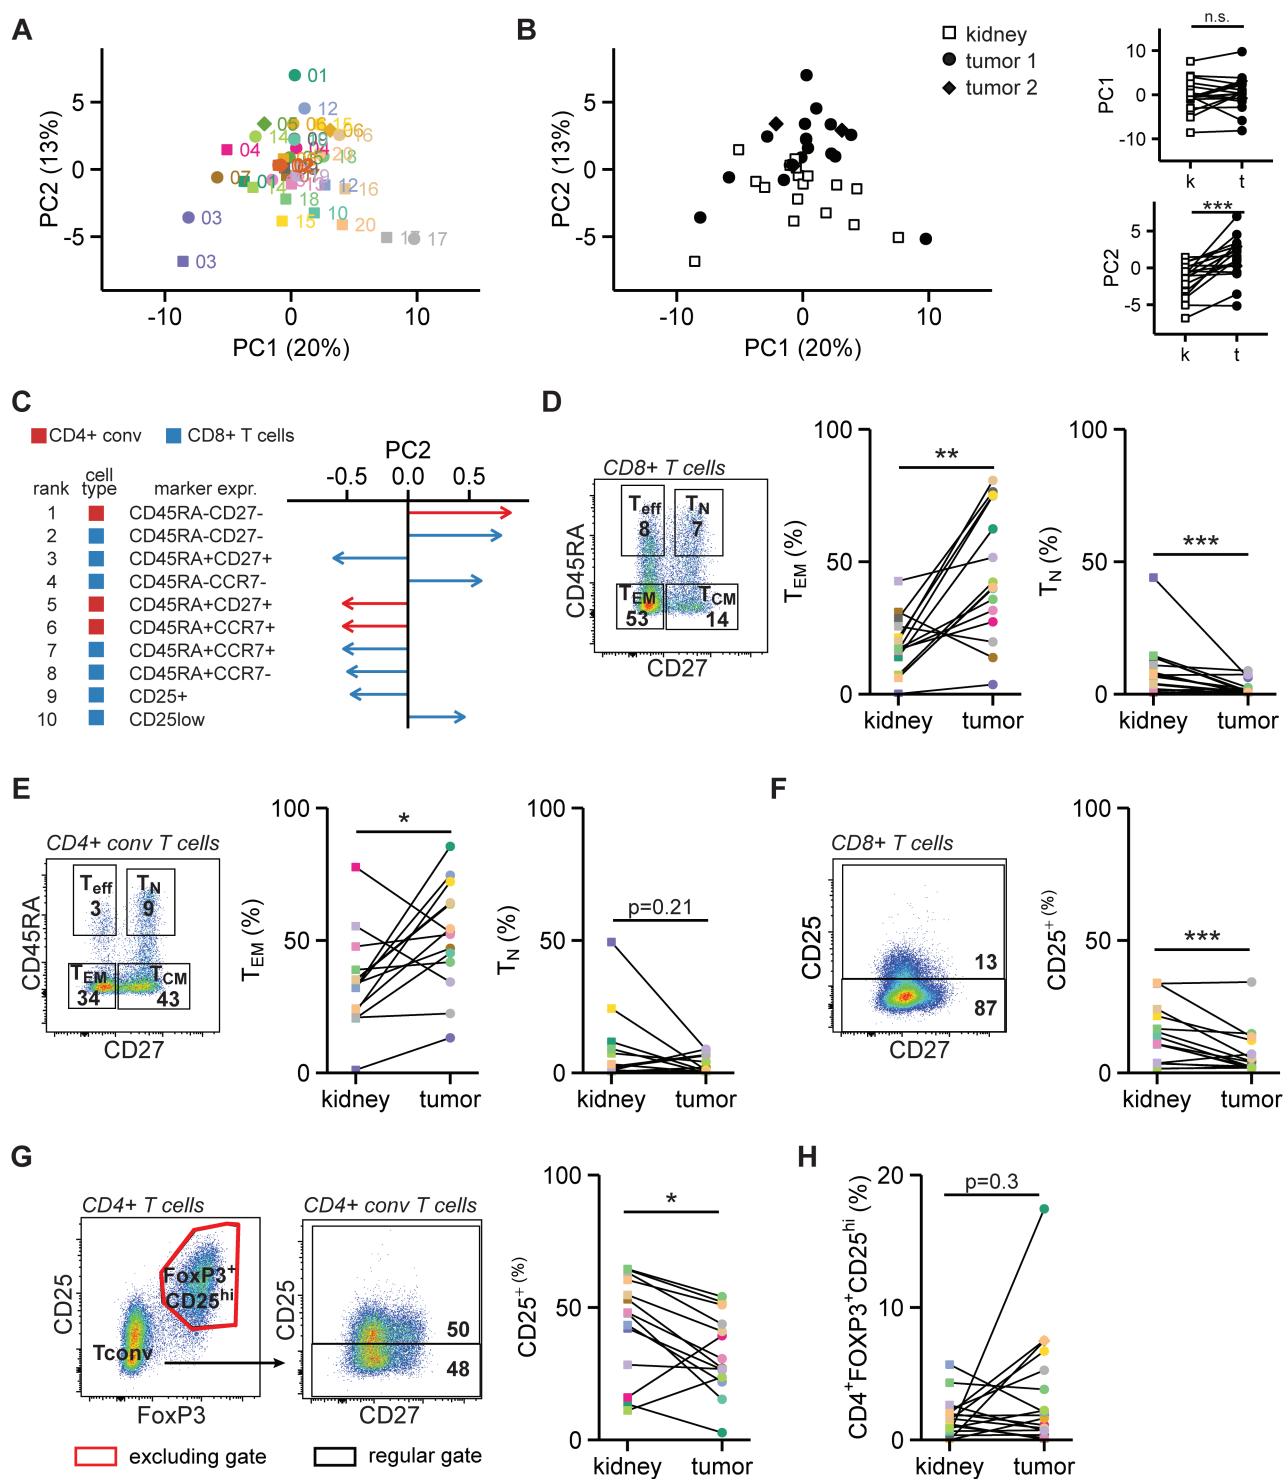

**Fig. 3**

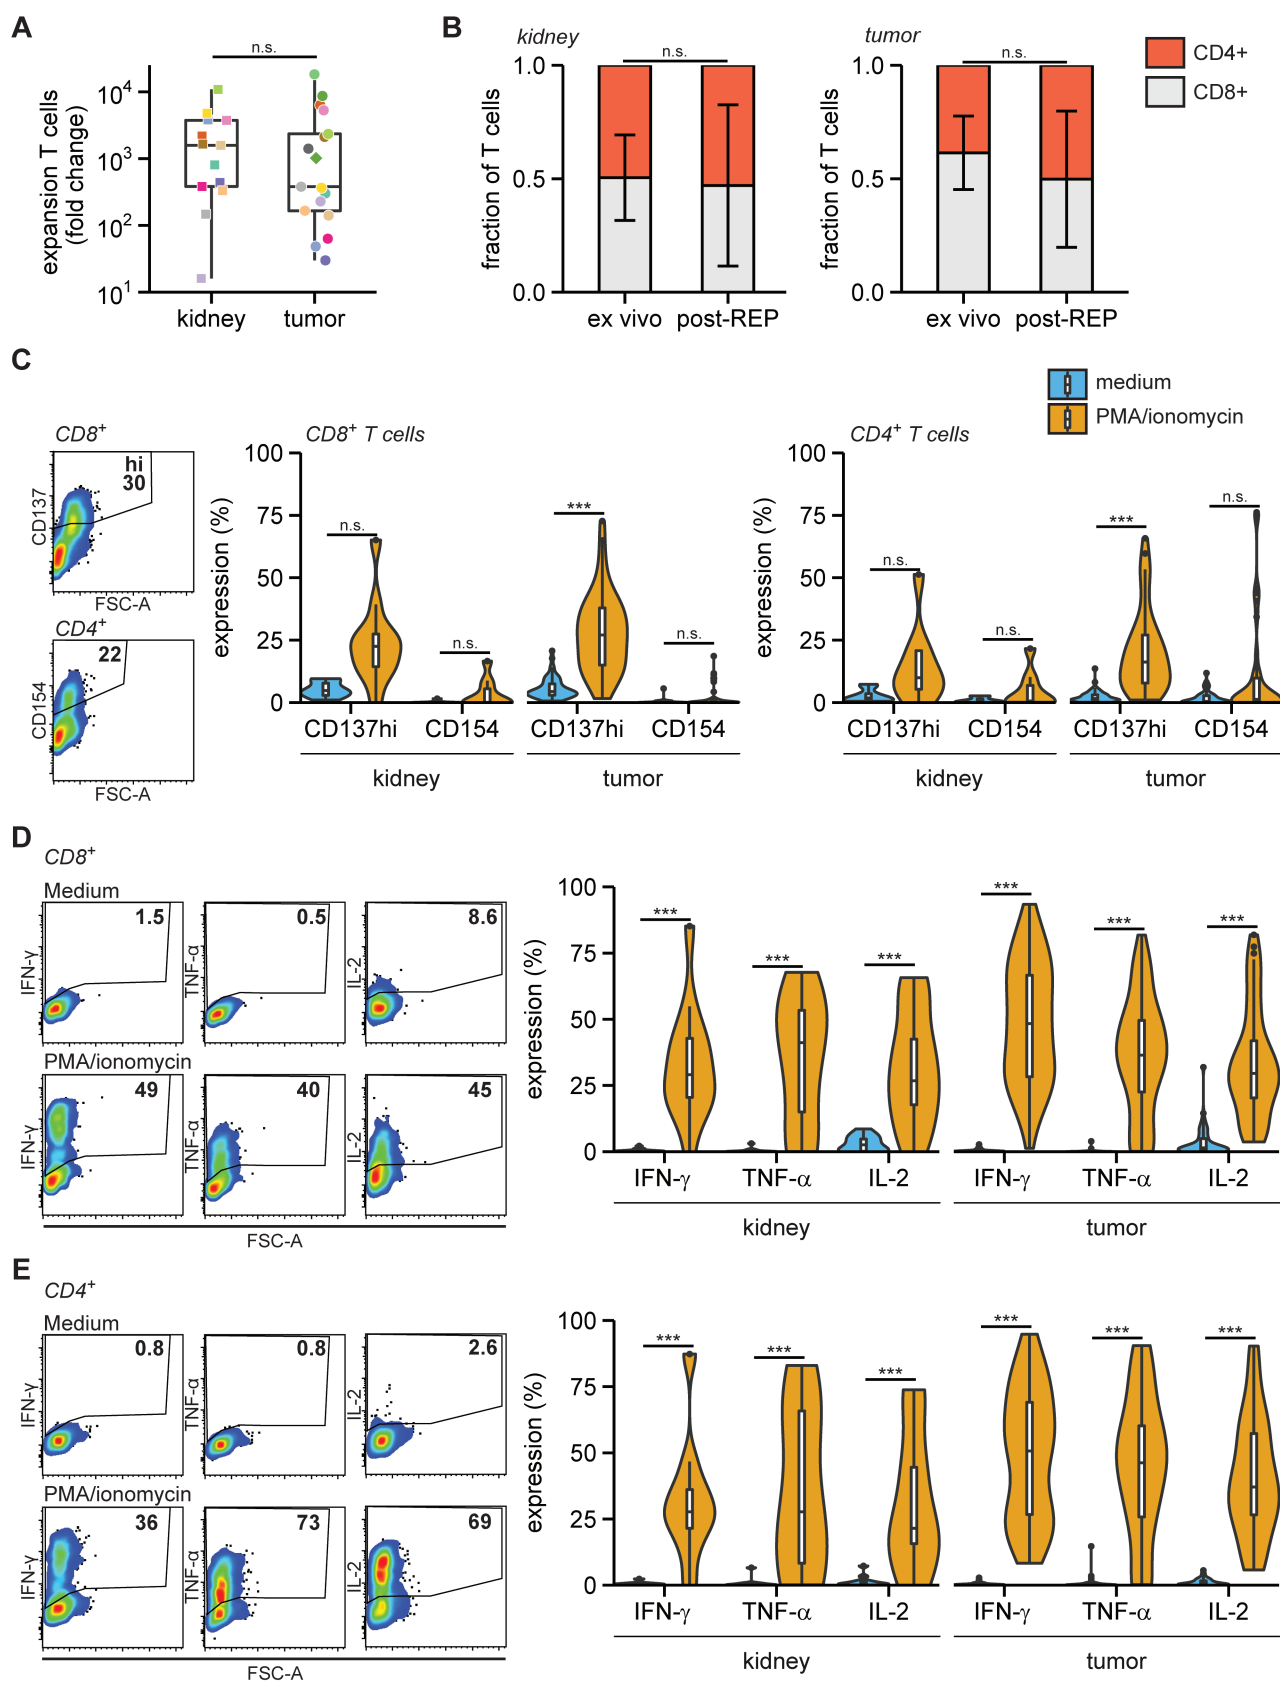

**Fig. 4**

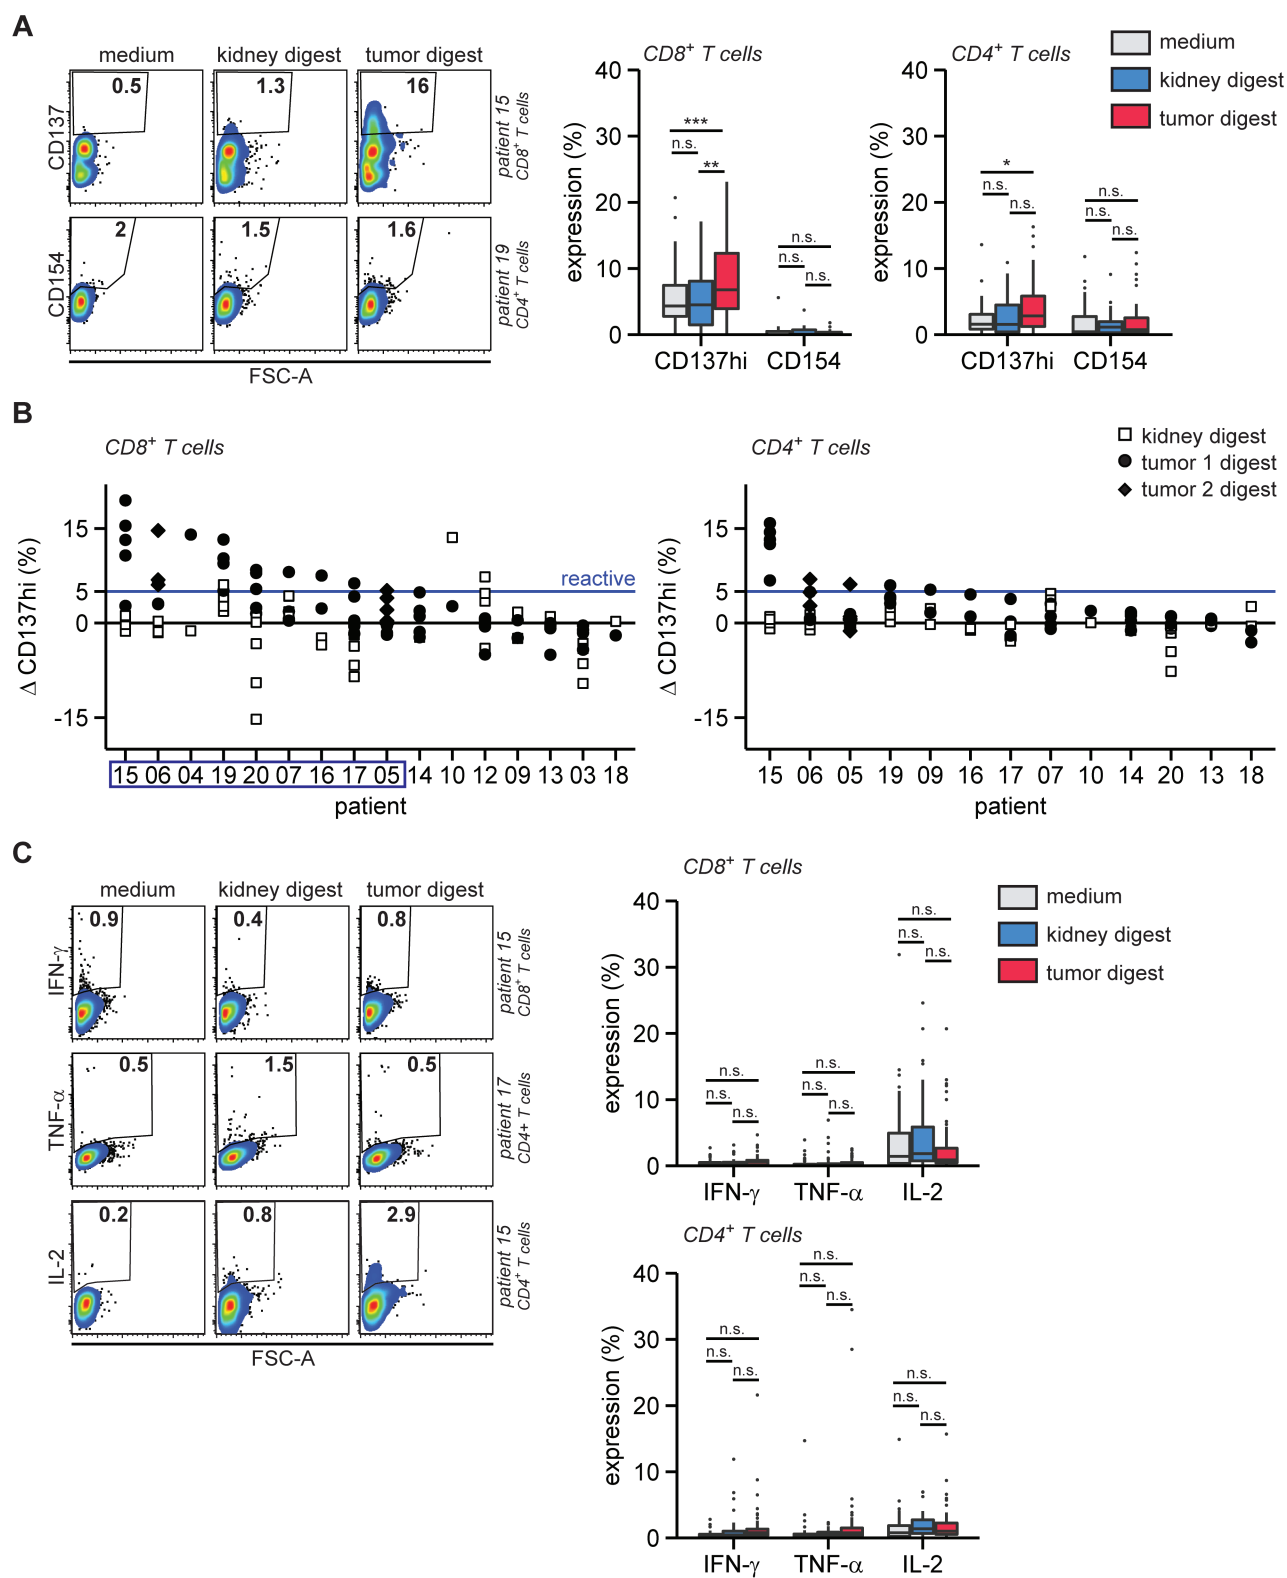

Table 1. patient and tumor characteristics

| Patient | Sex (M/F) | Age at surgery | Smoker | Pretreatment        | RCC type                        | Fuhrman grade | Max tumor diameter (cm) | # tumors within kidney | PD-L1 TC (%) | PD-L1 IC (IC0-3) |
|---------|-----------|----------------|--------|---------------------|---------------------------------|---------------|-------------------------|------------------------|--------------|------------------|
| 01      | M         | 61             | yes    | sunitinib           | ccRCC                           | 3             | 9                       | 1                      | 0            | IC1              |
| 02      | M         | 59             |        |                     | chRCC                           | NA            | 13                      | 2                      | 60           | IC1              |
| 03      | M         | 66             |        | sunitinib           | ccRCC                           | 2             | 9                       | 1                      | 0            | IC2              |
| 04      | M         | 75             |        | sunitinib           | ccRCC, metastasis adrenal gland | 2             | 8.5                     | 1                      | ND           | ND               |
| 05      | F         | 71             |        |                     | ccRCC                           | 2             | 8.5                     | 2                      | 0            | IC0              |
| 06      | M         | 59             |        |                     | ccRCC                           | 3             | 8                       | 2                      | 0            | IC0              |
| 07      | M         | 55             | yes    |                     | NOS, metastasis adrenal gland   | NA            | 13                      | 1                      | 1            | IC0              |
| 09      | M         | 54             | yes    | axitinib + avelumab | ccRCC, metastatic               | 3             | 7                       | 1                      | 90           | IC2              |
| 10      | F         | 61             |        |                     | ccRCC                           | 1             | 14                      | 1                      | 0            | IC0              |
| 12      | F         | 78             |        |                     | ccRCC                           | 4             | 5.5                     | 1                      | 10           | IC0              |
| 13      | M         | 80             |        |                     | chRCC                           | NA            | 7                       | 1                      | 0            | IC0              |
| 14      | M         | 57             |        |                     | ccRCC                           | 2             | 4.5                     | 1                      | 1            | IC2              |
| 15      | M         | 61             | yes    |                     | ccRCC                           | 3             | 9.2                     | 1                      | 0            | IC2              |
| 16      | M         | 57             |        |                     | ccRCC                           | 3             | 8.5                     | 1                      | 0            | IC1              |
| 17      | M         | 63             |        | pazopanib           | chRCC metastatic                | 4             | 16.5                    | 1                      | 0            | IC2              |
| 18      | F         | 64             |        | sunitinib           | ccRCC                           | 3             | 9.5                     | 1                      | 0            | IC1              |
| 19      | F         | 65             | yes    |                     | chRCC                           | 2             | 8.5                     | 1                      | 30           | IC0              |
| 20      | M         | 52             | yes    | sunitinib           | ccRCC, metastatic               | 1             | 7                       | 1                      | 0            | IC2              |

Abbreviations: M = male, F = female, ccRCC = clear cell RCC, chRCC = chromophobe RCC, NOS = not otherwise specified, NA = not applicable, ND = not determined, TC = tumor cell, IC = immune cell, IC0-3 = PD-L1 immune cell score 0-3
